# Supplementary material for: High-Resolution Profiling of Stationary-Phase Survival Reveals Yeast Longevity Factors and Their Genetic Interactions
Source: PubMed Central journal article supplement (PMC3937222; doi:10.1371/journal.pgen.1004168), 2014-02-27

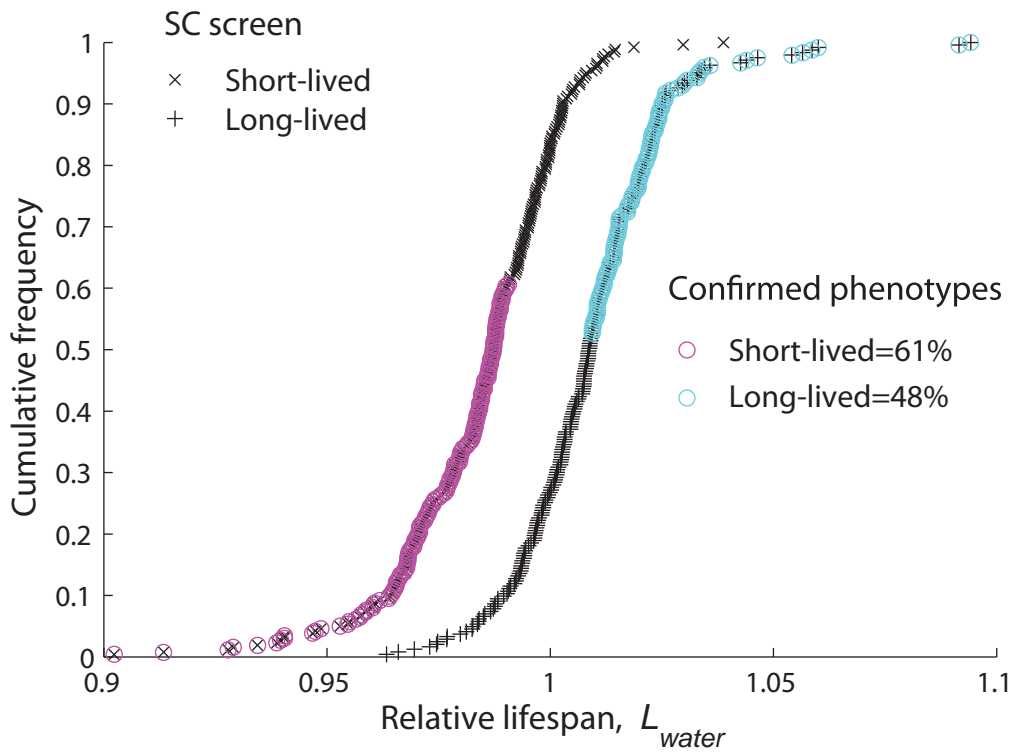

Supplement: pgen.1004168.s007.pdf [file pgen.1004168.s007.pdf]
